# Supplementary material for: Theoretical investigations in the reactions of group 15 analogues of the monocationic five-membered N-heterocyclic carbenes: interplay of electrophilicity, basicity, and aromaticity governing the reactivity
Source: Royal Society of Chemistry journal article supplement (doi:10.1039/d1nj04631d), 2021-11-25
Supplement: d1nj04631d1.pdf [file d1nj04631d1.pdf]

# Supporting Information

## **Theoretical Investigations in the Reactions of Group 15 Analogues of the Monocationic Five-Membered N-Heterocyclic Carbenes: Interplay of Electrophilicity, Basicity, and Aromaticity Governing the Reactivity**

Zheng-Feng Zhang<sup>1</sup> and Ming-Der Su<sup>1,2,a)</sup>\*

<sup>1</sup>Department of Applied Chemistry, National Chiayi University, Chiayi 60004, Taiwan

<sup>2</sup>Department of Medicinal and Applied Chemistry, Kaohsiung Medical University, Kaohsiung 80708, Taiwan

a) E-mail: [midesu@mail.ncyu.edu.tw](mailto:midesu@mail.ncyu.edu.tw)

## Contents:

**Figure S1.** The optimized **G15-CH<sub>4</sub>-TS** (G15 = N, P, As, Sb, and Bi) structures (Å) at the BP86/def2-TZVP level of theory. The hydrogen is omitted for clarity.

**Figure S2.** ACID plots for the **G15-CH<sub>4</sub>-TS** (G15 = N, P, As, Sb, and Bi) molecules. For more information see the text.

**Figure S3.** The optimized **G15-CH<sub>4</sub>-Prod** (G15 = N, P, As, Sb, and Bi) structures (Å) at the BP86/def2-TZVP level of theory. The hydrogen is omitted for clarity.

**Figure S4.** The optimized **G15-C<sub>2</sub>H<sub>4</sub>-TS** (G15 = N, P, As, Sb, and Bi) structures (Å) at the BP86/def2-TZVP level of theory. The hydrogen is omitted for clarity.

**Figure S5.** ACID plots for the **G15-C<sub>2</sub>H<sub>4</sub>-TS** (G15 = N, P, As, Sb, and Bi) molecules. For more information see the text.

**Figure S6.** The optimized **G15-C<sub>2</sub>H<sub>4</sub>-Prod** (G15 = N, P, As, Sb, and Bi) structures (Å) at the BP86/def2-TZVP level of theory. The hydrogen is omitted for clarity.

**Table S1.**  $E_{\text{HOMO-2}}$  and  $E_{\text{LUMO}}$  (in eV) represent the energies of the highest occupied molecular orbital-2 and the lowest unoccupied molecular orbital, respectively.  $\mu$ ,  $\eta$  and  $\omega$  respectively represent the electronic chemical potential, the chemical hardness, and electrophilicity index of **G15-Rea**, whose definitions can be obtained from Figure 1. The calculations were performed at the BP86/def2-TZVP level of theory.

**Table S2.** Values of the Fukui function at the carbenic atom (G15) for **G15-Rea** calculated through eqs. (A), (B), and (C) for  $f_k^+$ ,  $f_k^-$ , and  $f_k^0$  respectively. The calculations were performed at the BP86/def2-TZVP level of theory.

**Table S3-S27.** Cartesian coordinates of the reactants, transition states, and products for the reaction of **G15-Rea** (G15 = N, P, As, Sb, and Bi) with  $\text{CH}_4$  and  $\text{C}_2\text{H}_4$  at BP86/def2-TZVP level of theory.

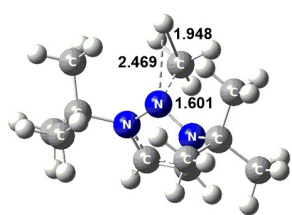

**N-CH<sub>4</sub>-TS**

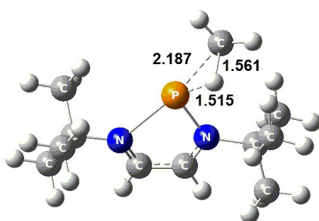

**P-CH<sub>4</sub>-TS**

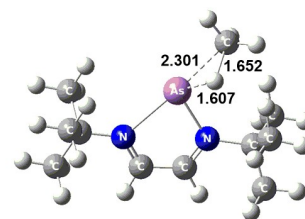

**As-CH<sub>4</sub>-TS**

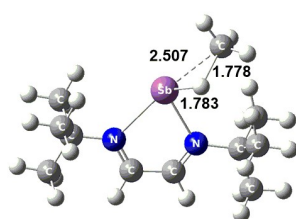

**Sb-CH<sub>4</sub>-TS**

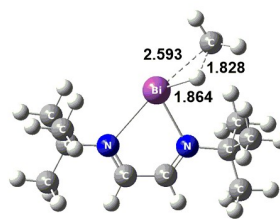

**Bi-CH<sub>4</sub>-TS**

**Figure S1.** The optimized **G15-CH<sub>4</sub>-TS** (G15 = N, P, As, Sb, and Bi) structures (Å) at the BP86/def2-TZVP level of theory. The hydrogen is omitted for clarity.

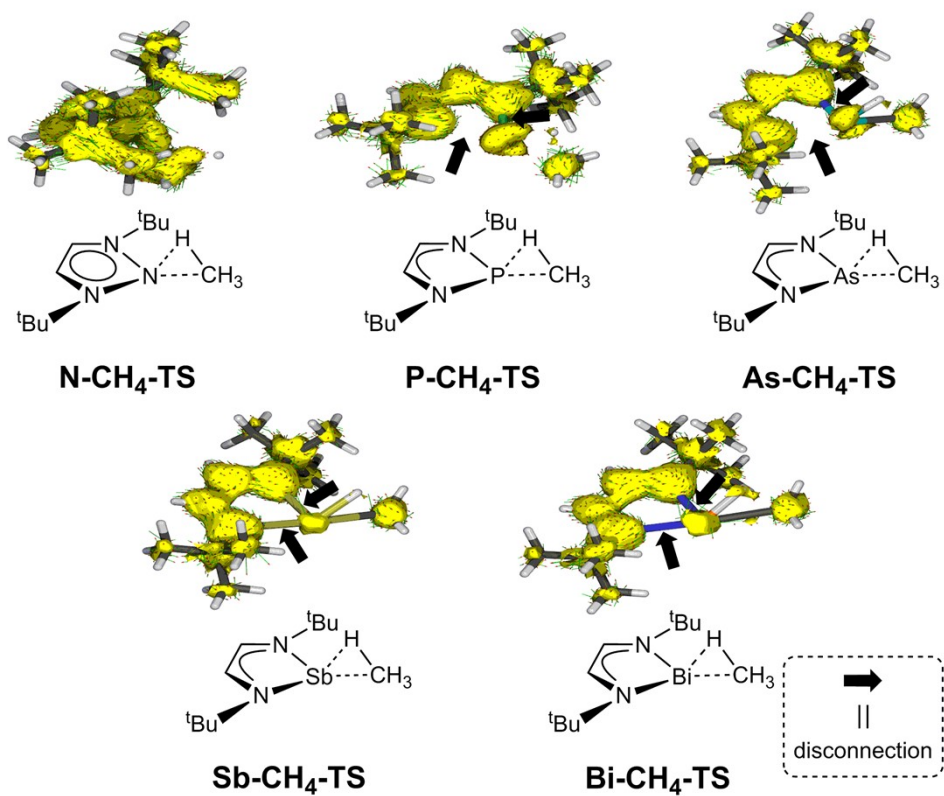

**Figure S2.** ACID plots for the **G15-CH<sub>4</sub>-TS** (G15 = N, P, As, Sb, and Bi) molecules. For more information see the text.

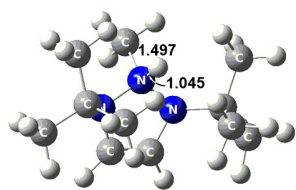

**N-CH<sub>4</sub>-Prod**

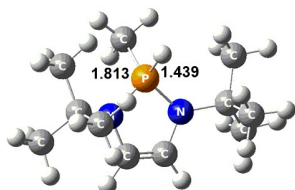

**P-CH<sub>4</sub>-Prod**

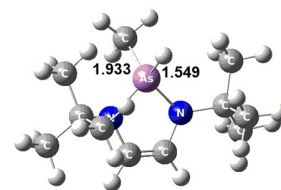

**As-CH<sub>4</sub>-Prod**

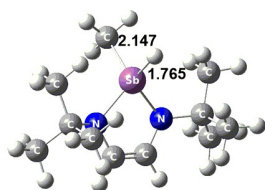

**Sb-CH<sub>4</sub>-Prod**

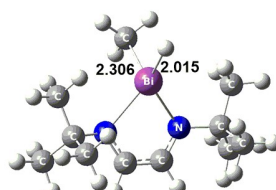

**Bi-CH<sub>4</sub>-Prod**

**Figure S3.** The optimized **G15-CH<sub>4</sub>-Prod** (G15 = N, P, As, Sb, and Bi) structures (Å) at the BP86/def2-TZVP level of theory. The hydrogen is omitted for clarity.

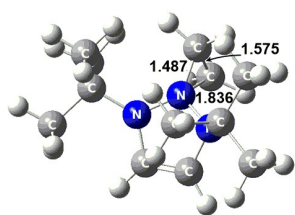

**N-C<sub>2</sub>H<sub>4</sub>-TS**

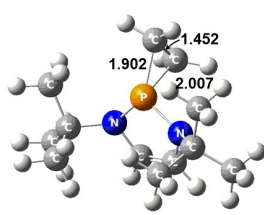

**P-C<sub>2</sub>H<sub>4</sub>-TS**

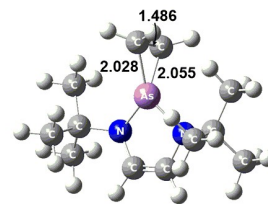

**As-C<sub>2</sub>H<sub>4</sub>-TS**

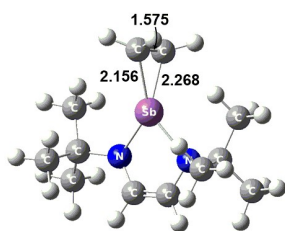

**Sb-C<sub>2</sub>H<sub>4</sub>-TS**

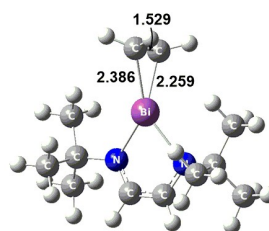

**Bi-C<sub>2</sub>H<sub>4</sub>-TS**

**Figure S4.** The optimized **G15-C<sub>2</sub>H<sub>4</sub>-TS** (G15 = N, P, As, Sb, and Bi) structures (Å) at the BP86/def2-TZVP level of theory. The hydrogen is omitted for clarity.

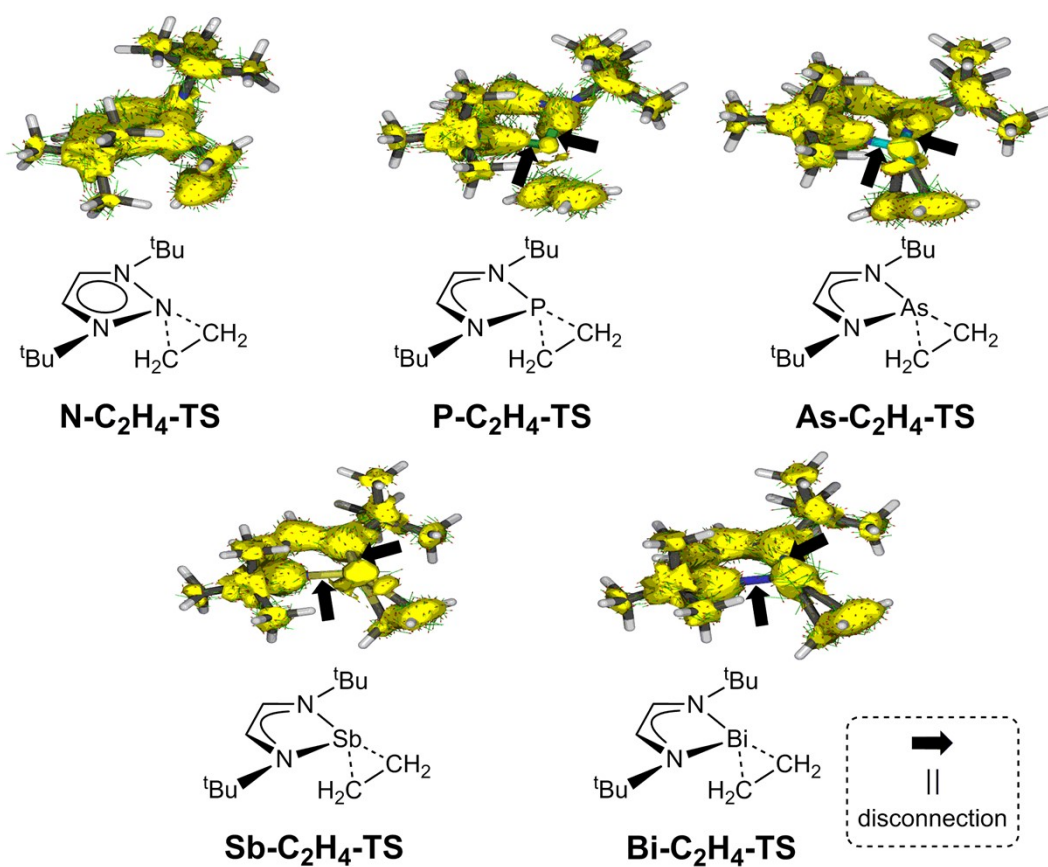

**Figure S5.** ACID plots for the **G15-C<sub>2</sub>H<sub>4</sub>-TS** (G15 = N, P, As, Sb, and Bi) molecules. For more information see the text.



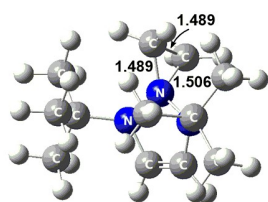

**N-C<sub>2</sub>H<sub>4</sub>-Prod**

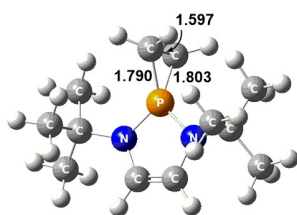

**P-C<sub>2</sub>H<sub>4</sub>-Prod**

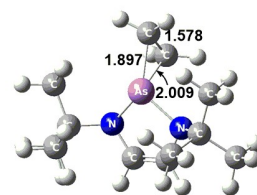

**As-C<sub>2</sub>H<sub>4</sub>-Prod**

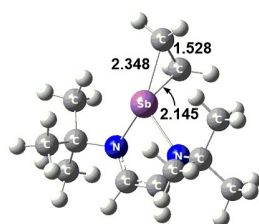

**Sb-C<sub>2</sub>H<sub>4</sub>-Prod**

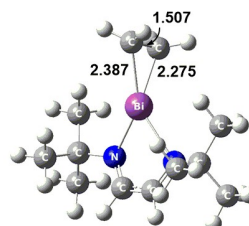

**Bi-C<sub>2</sub>H<sub>4</sub>-Prod**

**Figure S6.** The optimized **G15-C<sub>2</sub>H<sub>4</sub>-Prod** (G15 = N, P, As, Sb, and Bi) structures (Å) at the BP86/def2-TZVP level of theory. The hydrogen is omitted for clarity.

## Table S1

$E_{\text{HOMO-2}}$  and  $E_{\text{LUMO}}$  (in eV) represent the energies of the highest occupied molecular orbital-2 and the lowest unoccupied molecular orbital, respectively. The electronic chemical potential ( $\mu$ ), the chemical hardness ( $\eta$ ), and electrophilicity index ( $\omega$ ) of **G15-Rea** were obtained using eqs. (i), (ii), and (iii), respectively. Also see Figure 1. The calculations were performed at the BP86/def2-TZVP level of theory. See the text.

|                     | <b>N-Rea</b> | <b>P-Rea</b> | <b>As-Rea</b> | <b>Sb-Rea</b> | <b>Bi-Rea</b> |
|---------------------|--------------|--------------|---------------|---------------|---------------|
| $E_{\text{HOMO-2}}$ | -11.89       | -11.72       | -11.65        | -11.41        | -11.37        |
| $E_{\text{LUMO}}$   | -6.450       | -6.861       | -6.979        | -7.036        | -6.975        |
| $\mu$               | 18.34        | 18.58        | 18.63         | 18.45         | 18.35         |
| $\eta$              | 5.440        | 4.859        | 4.671         | 4.374         | 4.395         |
| $\omega$            | 30.92        | 35.53        | 37.15         | 38.90         | 38.29         |

(i)  $\mu = -(E_{\text{HOMO-2}} + E_{\text{LUMO}})/2$ .

(ii)  $\eta = E_{\text{LUMO}} - E_{\text{HOMO-2}}$ .

(iii)  $\omega = \mu^2/2\eta$ .

## Table S2

Values of the Fukui function at the carbenic atom (G15) for **G15-Rea** calculated through eqs. (A), (B), and (C) for  , respectively. The calculations were performed at the BP86/def2-TZVP level of theory. See the text.

|                                                                                     | N-Rea  | P-Rea  | As-Rea | Sb-Rea | Bi-Rea |
|-------------------------------------------------------------------------------------|--------|--------|--------|--------|--------|
| $q_k(N-1)$                                                                          | 0.254  | 1.376  | 1.417  | 1.447  | 1.504  |
| $q_k(N)$                                                                            | -0.012 | 1.004  | 1.010  | 1.076  | 1.048  |
| $q_k(N+1)$                                                                          | -0.267 | 0.591  | 0.587  | 0.624  | 0.582  |
|    | -0.255 | -0.413 | -0.423 | -0.452 | -0.466 |
| $f_k^-$                                                                             | -0.266 | -0.372 | -0.407 | -0.371 | -0.456 |
|  | -0.261 | -0.393 | -0.415 | -0.412 | -0.461 |

For nucleophilic attack:  $f_k^+ = q_k(N + 1) - q_k(N)$

(A)

For electrophilic attack:  $f_k^- = q_k(N) - q_k(N - 1)$

(B)

For radical attack:  $f_k^0 = \frac{1}{2} [f_k^+ + f_k^-]$

(C)

(All were calculated at BP86/def2-TZVP level of theory)

## Table S3

### N-Rea

| Atomic<br>Number | Coordinates (Angstroms) |             |             |
|------------------|-------------------------|-------------|-------------|
|                  | X                       | Y           | Z           |
| N                | 0.02505800              | -0.72478400 | 0.55244900  |
| C                | 0.79665900              | -1.59446900 | 1.27360900  |
| H                | 0.43435900              | -2.55029100 | 1.66163200  |
| C                | 2.04083800              | -0.98987200 | 1.36770400  |
| H                | 2.96276400              | -1.32157100 | 1.85292400  |
| N                | 1.91912500              | 0.19560300  | 0.69566100  |
| N                | 0.70171100              | 0.35744400  | 0.20226600  |
| C                | -1.43570400             | -0.85000400 | 0.12874900  |
| C                | -1.97517600             | -2.18212500 | 0.66739900  |
| H                | -1.43884400             | -3.05642800 | 0.24531100  |
| H                | -3.03557300             | -2.27419800 | 0.36202900  |
| H                | -1.95090300             | -2.23011900 | 1.77524800  |
| C                | -2.19147600             | 0.34471700  | 0.74045300  |
| H                | -1.79112400             | 1.30823100  | 0.36960700  |
| H                | -2.13764200             | 0.33465700  | 1.84799300  |
| H                | -3.25862600             | 0.28136600  | 0.45001400  |
| C                | -1.46739300             | -0.81818900 | -1.41102500 |
| H                | -0.89448200             | -1.66208100 | -1.84608000 |
| H                | -1.05958200             | 0.13364300  | -1.80337100 |
| H                | -2.51800300             | -0.90791300 | -1.75068400 |
| C                | 2.95994000              | 1.28711200  | 0.46271200  |
| C                | 4.26897500              | 0.84766900  | 1.13287700  |
| H                | 5.02561000              | 1.63847000  | 0.96461000  |
| H                | 4.67400300              | -0.08754400 | 0.69520300  |
| H                | 4.16218900              | 0.72891900  | 2.23048200  |
| C                | 2.41492600              | 2.57945400  | 1.09957700  |
| H                | 3.15091100              | 3.39321500  | 0.94690500  |
| H                | 2.25958400              | 2.45961200  | 2.19096900  |
| H                | 1.45972500              | 2.88793200  | 0.63199700  |
| C                | 3.13566300              | 1.43118700  | -1.06083200 |
| H                | 3.88814100              | 2.21873500  | -1.26266600 |
| H                | 2.18774400              | 1.72826300  | -1.55010600 |
| H                | 3.49708900              | 0.48800700  | -1.51846600 |

## Table S4

### P-Rea

| Atomic<br>Number | Coordinates (Angstroms) |             |            |
|------------------|-------------------------|-------------|------------|
|                  | X                       | Y           | Z          |
| N                | -0.22084800             | -0.53554000 | 0.36379400 |
| C                | 0.66916700              | -1.29835600 | 1.07283400 |
| H                | 0.38523700              | -2.27078800 | 1.49451800 |

|   |             |             |             |
|---|-------------|-------------|-------------|
| C | 1.90936600  | -0.69269900 | 1.17160600  |
| H | 2.79062500  | -1.09611000 | 1.68611300  |
| N | 1.94151200  | 0.52042400  | 0.53596900  |
| P | 0.44643500  | 0.94563100  | -0.19853200 |
| C | -1.65733600 | -0.96596500 | 0.10371800  |
| C | -2.35854500 | -1.13975200 | 1.46606900  |
| H | -1.89317200 | -1.93842300 | 2.07798900  |
| H | -3.41559900 | -1.42653500 | 1.29819500  |
| H | -2.34716200 | -0.19612400 | 2.04810000  |
| C | -2.34932100 | 0.13468000  | -0.71739100 |
| H | -1.86329700 | 0.28755800  | -1.70441500 |
| H | -2.38493600 | 1.10214400  | -0.17283900 |
| H | -3.39742500 | -0.16420600 | -0.91545700 |
| C | -1.62376600 | -2.28711200 | -0.69096200 |
| H | -1.14417200 | -3.10735300 | -0.11990000 |
| H | -1.08645800 | -2.16474800 | -1.65307200 |
| H | -2.66144200 | -2.60436300 | -0.91545700 |
| C | 3.18357900  | 1.39878500  | 0.49012300  |
| C | 4.30308000  | 0.60712400  | -0.21556200 |
| H | 5.20969100  | 1.24042600  | -0.28476600 |
| H | 4.00592400  | 0.31948500  | -1.24429700 |
| H | 4.58285000  | -0.30974700 | 0.34120600  |
| C | 3.56857900  | 1.75828000  | 1.93946200  |
| H | 4.45604500  | 2.42165400  | 1.92732400  |
| H | 3.83405400  | 0.86290000  | 2.53673800  |
| H | 2.74575700  | 2.29510300  | 2.45338000  |
| C | 2.84541800  | 2.67084900  | -0.30477800 |
| H | 3.74078200  | 3.32169400  | -0.34730000 |
| H | 2.03719100  | 3.26165500  | 0.17639100  |
| H | 2.55867500  | 2.44407600  | -1.35365100 |

## Table S5

### As-Rea

| Atomic<br>Number | Coordinates (Angstroms) |             |             |
|------------------|-------------------------|-------------|-------------|
|                  | X                       | Y           | Z           |
| N                | -0.27537300             | -0.52258500 | 0.31732200  |
| C                | 0.64155700              | -1.24068000 | 1.02025000  |
| H                | 0.38988300              | -2.22143500 | 1.44638700  |
| C                | 1.88211800              | -0.62325400 | 1.13596800  |
| H                | 2.74483600              | -1.04938200 | 1.66604100  |
| N                | 1.96021200              | 0.59010800  | 0.52591200  |
| As               | 0.37818400              | 1.10255200  | -0.30456400 |
| C                | -1.68880100             | -1.00919700 | 0.07098100  |
| C                | -2.38227800             | -1.19929200 | 1.43642500  |
| H                | -1.88519400             | -1.97552900 | 2.05217600  |
| H                | -3.42859000             | -1.52610900 | 1.27417100  |
| H                | -2.40278600             | -0.25193600 | 2.01217900  |
| C                | -2.42477000             | 0.05877300  | -0.75505500 |
| H                | -1.94725000             | 0.21893400  | -1.74578300 |
| H                | -2.49305000             | 1.02739700  | -0.21435400 |

|   |             |             |             |
|---|-------------|-------------|-------------|
| H | -3.46360600 | -0.27250100 | -0.95029000 |
| C | -1.61619200 | -2.33526300 | -0.71507300 |
| H | -1.10529000 | -3.13353400 | -0.14016300 |
| H | -1.08708200 | -2.20191600 | -1.68029700 |
| H | -2.64336000 | -2.69005300 | -0.93182500 |
| C | 3.21877800  | 1.43347500  | 0.52883900  |
| C | 4.34234600  | 0.63197900  | -0.16162800 |
| H | 5.26359700  | 1.24680700  | -0.19624400 |
| H | 4.06589500  | 0.36693700  | -1.20217800 |
| H | 4.58725400  | -0.29987900 | 0.38649200  |
| C | 3.57875900  | 1.76448800  | 1.99252400  |
| H | 4.48086700  | 2.40772100  | 2.01204200  |
| H | 3.80923400  | 0.85410400  | 2.58146900  |
| H | 2.75534300  | 2.31086000  | 2.49537300  |
| C | 2.92988200  | 2.72566400  | -0.25299100 |
| H | 3.83584200  | 3.36292100  | -0.26634200 |
| H | 2.12260100  | 3.32527800  | 0.22029700  |
| H | 2.66691700  | 2.51919200  | -1.31291600 |

## Table S6

### Sb-Rea

| Atomic<br>Number | Coordinates (Angstroms) |             |             |
|------------------|-------------------------|-------------|-------------|
|                  | X                       | Y           | Z           |
| N                | -0.38523900             | -0.44739100 | 0.32406800  |
| C                | 0.58153900              | -1.12137900 | 0.98543000  |
| H                | 0.36411100              | -2.09084000 | 1.45884600  |
| C                | 1.85133000              | -0.53473400 | 1.03736500  |
| H                | 2.69707100              | -1.01302900 | 1.55425800  |
| N                | 2.00783200              | 0.65824500  | 0.42202400  |
| Sb               | 0.26394100              | 1.36641500  | -0.48969400 |
| C                | -1.79186600             | -0.97677900 | 0.19893600  |
| C                | -2.39261700             | -1.13347600 | 1.61314700  |
| H                | -1.83724400             | -1.87681100 | 2.21949200  |
| H                | -3.43993100             | -1.48696500 | 1.53387800  |
| H                | -2.39429200             | -0.16730600 | 2.15737100  |
| C                | -2.60936900             | 0.04430400  | -0.60974600 |
| H                | -2.20206700             | 0.17481500  | -1.63697200 |
| H                | -2.66119400             | 1.02902700  | -0.09428500 |
| H                | -3.65420500             | -0.30478700 | -0.72748200 |
| C                | -1.75042500             | -2.32921300 | -0.54587500 |
| H                | -1.18213000             | -3.09582600 | 0.01802800  |
| H                | -1.29208800             | -2.22027200 | -1.54972400 |
| H                | -2.78215400             | -2.71185400 | -0.67716200 |
| C                | 3.32737200              | 1.38837600  | 0.40869500  |
| C                | 4.37784200              | 0.50462600  | -0.29915200 |
| H                | 5.34416700              | 1.04488100  | -0.34866700 |
| H                | 4.06464600              | 0.26114600  | -1.33467100 |
| H                | 4.55621200              | -0.44404700 | 0.24570700  |
| C                | 3.74191400              | 1.69525400  | 1.86451700  |
| H                | 4.69220400              | 2.26538100  | 1.86683300  |

|   |            |            |             |
|---|------------|------------|-------------|
| H | 3.90948500 | 0.77025300 | 2.45181100  |
| H | 2.97240100 | 2.30436400 | 2.38073200  |
| C | 3.13224600 | 2.69996000 | -0.37012800 |
| H | 4.08053900 | 3.27165900 | -0.40617700 |
| H | 2.38295100 | 3.36057700 | 0.11992600  |
| H | 2.83750600 | 2.51006900 | -1.42617800 |

---

## Table S7

### Bi-Rea

| Atomic<br>Number | Coordinates (Angstroms) |             |             |
|------------------|-------------------------|-------------|-------------|
|                  | X                       | Y           | Z           |
| N                | -0.44221700             | -0.38993000 | 0.38704600  |
| C                | 0.55042700              | -1.05866600 | 0.99983000  |
| H                | 0.34546800              | -2.01080100 | 1.51515600  |
| C                | 1.84793800              | -0.51726400 | 0.96780300  |
| H                | 2.68992900              | -1.03262300 | 1.45725000  |
| N                | 2.04446000              | 0.64768400  | 0.32565100  |
| Bi               | 0.21277400              | 1.48395600  | -0.57175900 |
| C                | -1.85857000             | -0.89454000 | 0.37104300  |
| C                | -2.37084200             | -1.00191700 | 1.82485700  |
| H                | -1.79108900             | -1.74090600 | 2.41341200  |
| H                | -3.42798200             | -1.33463000 | 1.82375700  |
| H                | -2.31671200             | -0.02230700 | 2.34173800  |
| C                | -2.70854400             | 0.12196800  | -0.41029100 |
| H                | -2.36521300             | 0.21407900  | -1.46512400 |
| H                | -2.70427500             | 1.11997600  | 0.08257600  |
| H                | -3.76694100             | -0.20272400 | -0.45237100 |
| C                | -1.89530300             | -2.26705300 | -0.33774000 |
| H                | -1.30561800             | -3.02991600 | 0.20904000  |
| H                | -1.50091100             | -2.19423900 | -1.37162200 |
| H                | -2.94071000             | -2.63109200 | -0.39097600 |
| C                | 3.39719700              | 1.29877800  | 0.24128600  |
| C                | 4.36839700              | 0.34711800  | -0.49261800 |
| H                | 5.35912600              | 0.83293300  | -0.59599000 |
| H                | 3.99625300              | 0.10018100  | -1.50764700 |
| H                | 4.51922500              | -0.59903200 | 0.06478600  |
| C                | 3.89457700              | 1.61269200  | 1.67011700  |
| H                | 4.87293300              | 2.13077300  | 1.61857200  |
| H                | 4.03840700              | 0.69125000  | 2.26916900  |
| H                | 3.18176500              | 2.27150700  | 2.20640200  |
| C                | 3.23910500              | 2.60413400  | -0.55706300 |
| H                | 4.21155700              | 3.12680200  | -0.64951900 |
| H                | 2.54797300              | 3.31198600  | -0.04694800 |
| H                | 2.88790100              | 2.40646700  | -1.59467400 |

---

## Table S8

### N-CH<sub>4</sub>-TS

| Atomic<br>Number | Coordinates (Angstroms) |             |             |
|------------------|-------------------------|-------------|-------------|
|                  | X                       | Y           | Z           |
| N                | -1.11180200             | -0.07286200 | -0.49752400 |
| C                | -0.70038100             | -0.75693500 | -1.60006200 |
| H                | -1.38621800             | -1.27751000 | -2.27779000 |
| C                | 0.70034000              | -0.75695500 | -1.60007000 |
| H                | 1.38615500              | -1.27754900 | -2.27780500 |
| N                | 1.11179200              | -0.07289300 | -0.49753600 |
| N                | 0.00000800              | 0.58934600  | 0.05633400  |
| C                | -2.39581400             | -0.19152800 | 0.28651400  |
| C                | -2.14940700             | -1.23554300 | 1.39996300  |
| H                | -1.86482900             | -2.21937600 | 0.97495300  |
| H                | -3.08066800             | -1.37152300 | 1.98597400  |
| H                | -1.35457900             | -0.89685700 | 2.09335200  |
| C                | -2.74786500             | 1.17540100  | 0.89414900  |
| H                | -3.02105000             | 1.91417000  | 0.11393500  |
| H                | -1.91895200             | 1.58994500  | 1.50961400  |
| H                | -3.62332500             | 1.05378200  | 1.56156300  |
| C                | -3.49671700             | -0.66291200 | -0.67744200 |
| H                | -3.31395300             | -1.68678900 | -1.06231800 |
| H                | -3.62198400             | 0.03283900  | -1.53181400 |
| H                | -4.45745300             | -0.69378100 | -0.12732900 |
| C                | 2.39581000              | -0.19159700 | 0.28648700  |
| C                | 3.49668900              | -0.66301200 | -0.67748200 |
| H                | 4.45743100              | -0.69390800 | -0.12737900 |
| H                | 3.62196700              | 0.03273800  | -1.53185400 |
| H                | 3.31389300              | -1.68688300 | -1.06235700 |
| C                | 2.14938500              | -1.23560700 | 1.39993800  |
| H                | 3.08064800              | -1.37161500 | 1.98594000  |
| H                | 1.86477500              | -2.21943200 | 0.97493000  |
| H                | 1.35457300              | -0.89689900 | 2.09333600  |
| C                | 2.74790500              | 1.17532100  | 0.89412100  |
| H                | 3.62337200              | 1.05367800  | 1.56152200  |
| H                | 1.91901200              | 1.58988500  | 1.50959900  |
| H                | 3.02110000              | 1.91408500  | 0.11390500  |
| C                | 0.00002400              | 2.05673900  | -0.58516400 |
| H                | 0.00001600              | 1.73095900  | -1.66193000 |
| H                | -0.92344100             | 2.63946500  | -0.43030500 |
| H                | 0.92350600              | 2.63944100  | -0.43031200 |
| H                | 0.00003700              | 2.76159300  | 1.23158100  |

## Table S9

### P-CH<sub>4</sub>-TS

| Atomic<br>Number | Coordinates (Angstroms) |             |            |
|------------------|-------------------------|-------------|------------|
|                  | X                       | Y           | Z          |
| N                | -0.21839500             | 0.21914600  | 0.94078100 |
| C                | 0.57198300              | -0.03631200 | 1.97343300 |
| H                | 0.19905400              | -0.68975200 | 2.77321800 |



|   |             |             |             |
|---|-------------|-------------|-------------|
| C | 1.91738900  | 0.48399800  | 2.07470100  |
| H | 2.46884400  | 0.33976400  | 3.02576000  |
| N | 2.39157900  | 1.05911700  | 1.01832000  |
| P | 0.46232300  | 1.35837200  | -0.36162000 |
| C | -1.59057200 | -0.54097700 | 0.90770100  |
| C | -1.54976500 | -1.76538100 | 1.85135700  |
| H | -0.71101600 | -2.45332200 | 1.62120300  |
| H | -2.48988900 | -2.33065100 | 1.70110600  |
| H | -1.52461300 | -1.49570500 | 2.92621700  |
| C | -2.69802500 | 0.41273300  | 1.39790300  |
| H | -2.87239500 | 1.26641500  | 0.72139900  |
| H | -2.46697200 | 0.80447500  | 2.40921100  |
| H | -3.64878100 | -0.15282300 | 1.46732200  |
| C | -1.84697600 | -1.07901000 | -0.51486500 |
| H | -1.00519600 | -1.70634800 | -0.86916100 |
| H | -2.04484000 | -0.29149200 | -1.26487300 |
| H | -2.75387100 | -1.71483100 | -0.48793400 |
| C | 3.74244400  | 1.64028600  | 0.90645000  |
| C | 4.55936500  | 1.55019900  | 2.20701100  |
| H | 5.55555700  | 2.00846500  | 2.04867800  |
| H | 4.73062400  | 0.49931100  | 2.52071200  |
| H | 4.07441100  | 2.09859900  | 3.04147600  |
| C | 3.54931200  | 3.12171900  | 0.48946300  |
| H | 4.54202400  | 3.59080400  | 0.33756000  |
| H | 3.01309000  | 3.69125600  | 1.27537200  |
| H | 2.97937500  | 3.20189600  | -0.45710300 |
| C | 4.44329500  | 0.86117700  | -0.23654000 |
| H | 5.44411600  | 1.30025700  | -0.42210300 |
| H | 3.85745900  | 0.91628800  | -1.17544900 |
| H | 4.57761400  | -0.20607700 | 0.03268300  |
| C | -1.39947200 | 2.32293800  | -0.98627000 |
| H | -2.28470200 | 1.84287300  | -1.45185200 |
| H | -1.68671900 | 2.85321400  | -0.06102800 |
| H | -0.90646300 | 3.00545700  | -1.70517000 |
| H | -0.67209200 | 0.97530900  | -1.29008300 |

## Table S10

### As-CH<sub>4</sub>-TS

| Atomic<br>Number | Coordinates (Angstroms) |             |             |
|------------------|-------------------------|-------------|-------------|
|                  | X                       | Y           | Z           |
| N                | -0.21862200             | 0.15132000  | 0.96558200  |
| C                | 0.62794100              | -0.14120700 | 1.93105100  |
| H                | 0.30831600              | -0.83980800 | 2.71779700  |
| C                | 1.98196200              | 0.37912100  | 2.01267600  |
| H                | 2.58687100              | 0.09024700  | 2.89592600  |
| N                | 2.40672600              | 1.12077300  | 1.04513000  |
| As               | 0.47230700              | 1.44491800  | -0.43559300 |
| C                | -1.60147900             | -0.54694800 | 0.98243000  |
| C                | -1.65692600             | -1.65523400 | 2.05642900  |
| H                | -0.89146600             | -2.44297300 | 1.90226700  |

|   |             |             |             |
|---|-------------|-------------|-------------|
| H | -2.64686700 | -2.14469200 | 1.97638600  |
| H | -1.58464600 | -1.26467100 | 3.09180200  |
| C | -2.67240700 | 0.50869700  | 1.32497800  |
| H | -2.74927800 | 1.30620100  | 0.56744400  |
| H | -2.46730800 | 0.97594400  | 2.30940500  |
| H | -3.66062500 | 0.01080500  | 1.38638700  |
| C | -1.83687700 | -1.21788100 | -0.38678600 |
| H | -1.02673900 | -1.93539900 | -0.62605100 |
| H | -1.92492100 | -0.49580400 | -1.21819100 |
| H | -2.78985500 | -1.78162500 | -0.34727500 |
| C | 3.76234700  | 1.70303800  | 0.96824800  |
| C | 4.65211700  | 1.35413000  | 2.17380000  |
| H | 5.64685400  | 1.82427900  | 2.04410900  |
| H | 4.81778400  | 0.26062900  | 2.26779500  |
| H | 4.23158000  | 1.73620900  | 3.12733600  |
| C | 3.56864700  | 3.23807200  | 0.86473600  |
| H | 4.55708600  | 3.72601500  | 0.74808400  |
| H | 3.08837200  | 3.64292700  | 1.77849300  |
| H | 2.94539400  | 3.50878400  | -0.01081000 |
| C | 4.38600200  | 1.16029900  | -0.34318200 |
| H | 5.38531100  | 1.61615400  | -0.49275200 |
| H | 3.75664300  | 1.40864700  | -1.22111900 |
| H | 4.51046100  | 0.05932500  | -0.30027900 |
| C | -1.49769200 | 2.18759000  | -1.36576700 |
| H | -2.28956900 | 1.55866500  | -1.81659600 |
| H | -1.90392400 | 2.80805300  | -0.54723900 |
| H | -1.00482400 | 2.81290900  | -2.13615500 |
| H | -0.55958500 | 0.83388300  | -1.50551100 |

## Table S11

### Sb-CH<sub>4</sub>-TS

| Atomic<br>Number | Coordinates (Angstroms) |             |             |
|------------------|-------------------------|-------------|-------------|
|                  | X                       | Y           | Z           |
| N                | -0.20859700             | 0.09625900  | 1.00099500  |
| C                | 0.68141100              | -0.23807200 | 1.90193200  |
| H                | 0.40764800              | -0.96784500 | 2.68066700  |
| C                | 2.04434300              | 0.27766300  | 1.94484700  |
| H                | 2.70847900              | -0.13009600 | 2.73262400  |
| N                | 2.41602300              | 1.16240200  | 1.08005100  |
| Sb               | 0.50328700              | 1.61063000  | -0.55476200 |
| C                | -1.60390600             | -0.52884700 | 1.07668800  |
| C                | -1.72255400             | -1.54646500 | 2.23007600  |
| H                | -1.03034900             | -2.40620200 | 2.11876000  |
| H                | -2.75073200             | -1.95724100 | 2.21188300  |
| H                | -1.58069200             | -1.08532500 | 3.22895400  |
| C                | -2.61145700             | 0.61297500  | 1.32731000  |
| H                | -2.60239600             | 1.36470000  | 0.51874700  |
| H                | -2.39880600             | 1.12554900  | 2.28736900  |
| H                | -3.63479100             | 0.19150600  | 1.38514200  |
| C                | -1.87226000             | -1.27047500 | -0.24955700 |

|   |             |             |             |
|---|-------------|-------------|-------------|
| H | -1.12417500 | -2.07160200 | -0.41539900 |
| H | -1.86173800 | -0.59374700 | -1.12203400 |
| H | -2.87417700 | -1.74161100 | -0.20506400 |
| C | 3.77995600  | 1.74401600  | 1.02939200  |
| C | 4.72250400  | 1.19564300  | 2.11470800  |
| H | 5.71492800  | 1.67736200  | 2.01334900  |
| H | 4.87977400  | 0.10116200  | 2.01856300  |
| H | 4.35554400  | 1.41705200  | 3.13849500  |
| C | 3.60271200  | 3.27471000  | 1.19418700  |
| H | 4.58981500  | 3.77234600  | 1.11236400  |
| H | 3.17171100  | 3.52317800  | 2.18513800  |
| H | 2.94256300  | 3.69522800  | 0.40874800  |
| C | 4.34189200  | 1.42277300  | -0.37876300 |
| H | 5.34704100  | 1.87726600  | -0.48758500 |
| H | 3.69368000  | 1.83343600  | -1.17936700 |
| H | 4.43820900  | 0.32881300  | -0.53181000 |
| C | -1.64582400 | 2.00705900  | -1.78430900 |
| H | -2.27589500 | 1.21676400  | -2.23226900 |
| H | -2.22124300 | 2.60741400  | -1.05597400 |
| H | -1.19167800 | 2.64538900  | -2.56818900 |
| H | -0.42114600 | 0.71762300  | -1.79092400 |

## Table S12

### Bi-CH<sub>4</sub>-TS

| Atomic<br>Number | Coordinates (Angstroms) |             |             |
|------------------|-------------------------|-------------|-------------|
|                  | X                       | Y           | Z           |
| N                | 1.14049100              | 0.88195100  | -0.01465800 |
| C                | 0.30847800              | 1.88796200  | 0.01094500  |
| H                | 0.70908500              | 2.91592200  | 0.03023000  |
| C                | -1.14970700             | 1.77223100  | 0.00305100  |
| H                | -1.71303600             | 2.72642000  | -0.02855800 |
| N                | -1.71757800             | 0.61253900  | 0.03069000  |
| Bi               | 0.12376200              | -1.28634100 | -0.07386500 |
| C                | 2.63893900              | 1.14316400  | 0.00607000  |
| C                | 2.97245100              | 2.64874600  | -0.00272600 |
| H                | 2.60461600              | 3.16303600  | -0.91435900 |
| H                | 4.07478500              | 2.75403300  | 0.00452700  |
| H                | 2.59365400              | 3.17790700  | 0.89574600  |
| C                | 3.19404200              | 0.51794300  | 1.30419000  |
| H                | 3.00579500              | -0.57015700 | 1.35269200  |
| H                | 2.74395400              | 0.99380000  | 2.19901800  |
| H                | 4.29035100              | 0.67430600  | 1.34828200  |
| C                | 3.25202300              | 0.49534800  | -1.25325200 |
| H                | 2.83123300              | 0.94240700  | -2.17638600 |
| H                | 3.08328500              | -0.59657200 | -1.28438500 |
| H                | 4.34672700              | 0.66706800  | -1.25642600 |
| C                | -3.19048700             | 0.42879100  | 0.02219000  |
| C                | -3.98244500             | 1.74690200  | -0.03446400 |
| H                | -5.06716100             | 1.52199000  | -0.03680800 |

|   |             |             |             |
|---|-------------|-------------|-------------|
| H | -3.76685400 | 2.32502200  | -0.95702700 |
| H | -3.78558000 | 2.39199900  | 0.84691400  |
| C | -3.53346500 | -0.34674600 | 1.31899700  |
| H | -4.61951900 | -0.56720600 | 1.34483000  |
| H | -3.28012600 | 0.24793800  | 2.21990400  |
| H | -2.98923000 | -1.31186500 | 1.37264300  |
| C | -3.51620600 | -0.44100600 | -1.21783400 |
| H | -4.60408000 | -0.65154400 | -1.24891300 |
| H | -2.98446600 | -1.41428700 | -1.18466200 |
| H | -3.23738200 | 0.07826500  | -2.15699600 |
| C | 2.21638600  | -2.79907200 | 0.16377100  |
| H | 3.09549400  | -2.73136200 | -0.50158500 |
| H | 2.49776800  | -2.62256300 | 1.21789100  |
| H | 1.69002700  | -3.76527500 | 0.03526000  |
| H | 1.44649600  | -1.90576600 | -1.23318600 |

## Table S13

### N-CH<sub>4</sub>-Prod

| Atomic<br>Number | Coordinates (Angstroms) |             |             |
|------------------|-------------------------|-------------|-------------|
|                  | X                       | Y           | Z           |
| N                | -0.16351200             | -0.36686500 | 0.27199400  |
| C                | 0.80376100              | -1.30340200 | 0.73202600  |
| H                | 0.48415000              | -2.31808500 | 0.98997900  |
| C                | 2.05996500              | -0.82115300 | 0.65172100  |
| H                | 3.00072700              | -1.35189100 | 0.82943400  |
| N                | 2.09728700              | 0.50120700  | 0.12793800  |
| N                | 0.66499200              | 0.79259300  | -0.16466500 |
| C                | -1.39008200             | -0.04863500 | 1.11504300  |
| C                | -1.02442600             | 0.55338600  | 2.48391400  |
| H                | -0.29887400             | -0.08454900 | 3.02813500  |
| H                | -1.93436700             | 0.64509800  | 3.11010900  |
| H                | -0.60256100             | 1.57789900  | 2.40107800  |
| C                | -2.29614000             | 0.90651400  | 0.31692200  |
| H                | -2.58115200             | 0.47380300  | -0.66317400 |
| H                | -1.83426900             | 1.90493600  | 0.14942600  |
| H                | -3.22602800             | 1.09481800  | 0.88900000  |
| C                | -2.10915100             | -1.40189800 | 1.29581600  |
| H                | -1.55277100             | -2.08665200 | 1.96581800  |
| H                | -2.27203000             | -1.90202200 | 0.32043800  |
| H                | -3.09811800             | -1.22309000 | 1.76184400  |
| C                | 2.88313900              | 1.59058900  | 0.84382700  |
| C                | 4.33725800              | 1.07485200  | 0.87403500  |
| H                | 4.99826700              | 1.88668100  | 1.23631000  |
| H                | 4.67753400              | 0.77735900  | -0.13773300 |
| H                | 4.46474600              | 0.21870800  | 1.56551100  |
| C                | 2.37266800              | 1.84378000  | 2.27401700  |
| H                | 3.05418500              | 2.54299600  | 2.79857200  |
| H                | 2.32904100              | 0.90474900  | 2.86216900  |
| H                | 1.36886900              | 2.31934400  | 2.29162700  |
| C                | 2.81680100              | 2.87582700  | -0.00107200 |

|   |             |            |             |
|---|-------------|------------|-------------|
| H | 3.43919700  | 3.65989000 | 0.47357200  |
| H | 1.79031700  | 3.30048000 | -0.06653800 |
| H | 3.20279600  | 2.70974400 | -1.02698500 |
| H | 0.37105800  | 1.64541400 | 0.36391700  |
| C | 0.49323200  | 0.99631600 | -1.63814200 |
| H | 0.82101200  | 0.06399300 | -2.13008600 |
| H | -0.57465100 | 1.19054400 | -1.84285800 |
| H | 1.12674200  | 1.84549000 | -1.95054600 |

## Table S14

### P-CH<sub>4</sub>-Prod

| Atomic<br>Number | Coordinates (Angstroms) |             |             |
|------------------|-------------------------|-------------|-------------|
|                  | X                       | Y           | Z           |
| N                | -0.27185000             | -0.16845500 | 0.66739200  |
| C                | 0.72101800              | -1.11040900 | 1.08144200  |
| H                | 0.41233700              | -2.12586900 | 1.35123600  |
| C                | 1.98809400              | -0.64813400 | 0.99303000  |
| H                | 2.90610100              | -1.21613900 | 1.17709500  |
| N                | 2.08549800              | 0.69155000  | 0.50290600  |
| P                | 0.52161200              | 1.24084800  | 0.18356500  |
| C                | -1.70963800             | -0.25305300 | 1.15005700  |
| C                | -1.75164800             | 0.06657100  | 2.65770900  |
| H                | -1.10624400             | -0.62893200 | 3.23172700  |
| H                | -2.78569900             | -0.03133100 | 3.04548900  |
| H                | -1.41379500             | 1.10374600  | 2.86656400  |
| C                | -2.55469000             | 0.75907900  | 0.35626700  |
| H                | -2.56451300             | 0.52767500  | -0.72848400 |
| H                | -2.21495700             | 1.80751000  | 0.50909400  |
| H                | -3.60302500             | 0.72451000  | 0.71252500  |
| C                | -2.22934100             | -1.67687800 | 0.87280200  |
| H                | -1.71863100             | -2.44141100 | 1.49127300  |
| H                | -2.11356300             | -1.94736300 | -0.19598300 |
| H                | -3.30671800             | -1.72747300 | 1.12716700  |
| C                | 3.28998900              | 1.56871000  | 0.79778000  |
| C                | 4.56043600              | 0.79764600  | 0.39055000  |
| H                | 5.44141900              | 1.45992500  | 0.50580800  |
| H                | 4.51114300              | 0.46916000  | -0.66706500 |
| H                | 4.74088000              | -0.08855300 | 1.03081600  |
| C                | 3.30732500              | 1.90681000  | 2.30188500  |
| H                | 4.20295500              | 2.51033600  | 2.55250800  |
| H                | 3.33521000              | 0.98536100  | 2.91826100  |
| H                | 2.41406200              | 2.49546700  | 2.60021500  |
| C                | 3.18254300              | 2.85123500  | -0.04611100 |
| H                | 4.04372300              | 3.51187900  | 0.17533900  |
| H                | 2.27290000              | 3.44402000  | 0.19703700  |
| H                | 3.20240200              | 2.63291100  | -1.13344200 |
| H                | 0.15114400              | 2.40159900  | 0.95096700  |
| C                | 0.23178000              | 1.70467000  | -1.54561700 |

|   |             |            |             |
|---|-------------|------------|-------------|
| H | 0.85730900  | 2.58212900 | -1.80403300 |
| H | 0.50024100  | 0.84418500 | -2.18974800 |
| H | -0.83618900 | 1.96523800 | -1.68563400 |

---

## Table S15

### As-CH<sub>4</sub>-Prod

| Atomic<br>Number | Coordinates (Angstroms) |             |             |
|------------------|-------------------------|-------------|-------------|
|                  | X                       | Y           | Z           |
| N                | -0.31103000             | -0.21774700 | 0.61908400  |
| C                | 0.73584100              | -1.07924600 | 1.05588000  |
| H                | 0.47382500              | -2.09787400 | 1.36448000  |
| C                | 1.99806200              | -0.59411300 | 0.97489600  |
| H                | 2.90511400              | -1.16348900 | 1.20845800  |
| N                | 2.14534500              | 0.72644300  | 0.46161900  |
| As               | 0.46150200              | 1.38268100  | 0.19703800  |
| C                | -1.72557400             | -0.35339500 | 1.13843900  |
| C                | -1.76572300             | -0.04487000 | 2.64862000  |
| H                | -1.08862900             | -0.71835400 | 3.21224300  |
| H                | -2.79091100             | -0.18258700 | 3.04778700  |
| H                | -1.46480600             | 1.00331600  | 2.86154600  |
| C                | -2.61088200             | 0.63253600  | 0.35651500  |
| H                | -2.60323600             | 0.41457600  | -0.73108800 |
| H                | -2.30644400             | 1.69132000  | 0.52344700  |
| H                | -3.65947400             | 0.56193600  | 0.70666300  |
| C                | -2.19701400             | -1.79495900 | 0.85808600  |
| H                | -1.64421700             | -2.54324000 | 1.46004300  |
| H                | -2.08834000             | -2.05132800 | -0.21475600 |
| H                | -3.26685900             | -1.88935600 | 1.13141200  |
| C                | 3.33556400              | 1.59149900  | 0.81384300  |
| C                | 4.61327500              | 0.82201000  | 0.42094100  |
| H                | 5.49472000              | 1.47729400  | 0.56877700  |
| H                | 4.58446200              | 0.51289100  | -0.64308500 |
| H                | 4.77275000              | -0.07751200 | 1.04807100  |
| C                | 3.32774300              | 1.91210700  | 2.32200900  |
| H                | 4.21959400              | 2.51011300  | 2.59821000  |
| H                | 3.34060000              | 0.98349100  | 2.92799500  |
| H                | 2.43095100              | 2.50055200  | 2.61199900  |
| C                | 3.24267100              | 2.88200300  | -0.01871300 |
| H                | 4.10153400              | 3.54370100  | 0.20854700  |
| H                | 2.33105200              | 3.47381000  | 0.22687800  |
| H                | 3.26062600              | 2.66818700  | -1.10699400 |
| H                | 0.05395000              | 2.59145400  | 1.07682900  |
| C                | 0.14154700              | 1.90802500  | -1.63576200 |
| H                | 0.42711600              | 1.05908500  | -2.28516500 |
| H                | -0.93290600             | 2.14803400  | -1.75191400 |
| H                | 0.75781900              | 2.79977400  | -1.86048700 |

---

## Table S16

### Sb-CH<sub>4</sub>-Prod

| Atomic<br>Number | Coordinates (Angstroms) |             |             |
|------------------|-------------------------|-------------|-------------|
|                  | X                       | Y           | Z           |
| N                | -1.38761000             | -0.52832200 | -0.43128100 |
| C                | -0.68036700             | -1.72095100 | -0.71360000 |
| H                | -1.27206500             | -2.61218700 | -0.96106200 |
| C                | 0.68038200              | -1.72103600 | -0.71302500 |
| H                | 1.27219500              | -2.61234800 | -0.96004400 |
| N                | 1.38755600              | -0.52836900 | -0.43096000 |
| Sb               | -0.00017200             | 0.84515700  | 0.20057800  |
| C                | -2.80038600             | -0.54981700 | 0.08112400  |
| C                | -2.88168400             | -1.28676200 | 1.43378900  |
| H                | -2.50576700             | -2.32615800 | 1.34444400  |
| H                | -3.92869000             | -1.33466100 | 1.79582400  |
| H                | -2.28158500             | -0.77075800 | 2.21410300  |
| C                | -3.24083400             | 0.91549900  | 0.23281900  |
| H                | -3.20416800             | 1.45379600  | -0.73661300 |
| H                | -2.60860500             | 1.45550000  | 0.97977000  |
| H                | -4.27719800             | 0.97975600  | 0.61896000  |
| C                | -3.68563300             | -1.24350400 | -0.97850400 |
| H                | -3.45351100             | -2.32272800 | -1.07464100 |
| H                | -3.56974100             | -0.76680400 | -1.97236300 |
| H                | -4.74922500             | -1.16710100 | -0.67636600 |
| C                | 2.80042000              | -0.54993500 | 0.08123100  |
| C                | 3.68494200              | -1.24464800 | -0.97829800 |
| H                | 4.74864200              | -1.16894600 | -0.67636300 |
| H                | 3.56922300              | -0.76819100 | -1.97229000 |
| H                | 3.45193300              | -2.32371200 | -1.07405500 |
| C                | 2.88195000              | -1.28580500 | 1.43442800  |
| H                | 3.92923300              | -1.33447400 | 1.79559400  |
| H                | 2.50482300              | -2.32487500 | 1.34654100  |
| H                | 2.28320200              | -0.76817300 | 2.21467600  |
| C                | 3.24147700              | 0.91531700  | 0.23178300  |
| H                | 4.27959800              | 0.97963100  | 0.61317900  |
| H                | 2.61275800              | 1.45483900  | 0.98194800  |
| H                | 3.20030300              | 1.45380100  | -0.73735000 |
| H                | -0.00146900             | 1.42721100  | 1.86735400  |
| C                | 0.00081500              | 2.60886400  | -1.02521000 |
| H                | 0.00264700              | 2.29039000  | -2.08424300 |
| H                | -0.91059800             | 3.18778800  | -0.78142200 |
| H                | 0.91074900              | 3.18892500  | -0.77860900 |

## Table S17

### Bi-CH<sub>4</sub>-Prod

| Atomic<br>Number | Coordinates (Angstroms) |   |   |
|------------------|-------------------------|---|---|
|                  | X                       | Y | Z |

|    |             |             |             |
|----|-------------|-------------|-------------|
| N  | -1.43209500 | 0.85844500  | 0.44290800  |
| C  | -0.70593900 | 1.98346100  | 0.42571900  |
| H  | -1.22425200 | 2.95096300  | 0.29732500  |
| C  | 0.70628500  | 1.98365500  | 0.42578200  |
| H  | 1.22430800  | 2.95121100  | 0.29684700  |
| N  | 1.43246800  | 0.85865400  | 0.44337300  |
| Bi | -0.00002300 | -0.91127700 | -0.24140900 |
| C  | -2.87277700 | 0.88517800  | 0.02570200  |
| C  | -3.03935600 | 1.42247900  | -1.41088400 |
| H  | -2.63560800 | 2.44975100  | -1.51742700 |
| H  | -4.11245300 | 1.45474300  | -1.68624100 |
| H  | -2.52340600 | 0.77012300  | -2.14767700 |
| C  | -3.38229200 | -0.56389800 | 0.12043700  |
| H  | -3.27818300 | -0.96411200 | 1.14917800  |
| H  | -2.83418300 | -1.22994100 | -0.58955400 |
| H  | -4.45083400 | -0.62878300 | -0.16604300 |
| C  | -3.64001600 | 1.77070000  | 1.04223300  |
| H  | -3.35057900 | 2.83794100  | 0.96513600  |
| H  | -3.46315400 | 1.43031900  | 2.08183300  |
| H  | -4.72668500 | 1.70680900  | 0.83379600  |
| C  | 2.87280800  | 0.88525900  | 0.02541700  |
| C  | 3.64065000  | 1.77205000  | 1.04042700  |
| H  | 4.72711200  | 1.70866100  | 0.83083800  |
| H  | 3.46511500  | 1.43239900  | 2.08049800  |
| H  | 3.35047300  | 2.83905600  | 0.96290900  |
| C  | 3.03756100  | 1.42110900  | -1.41186100 |
| H  | 4.11026100  | 1.45396200  | -1.68871200 |
| H  | 2.63270500  | 2.44790200  | -1.51900700 |
| H  | 2.52093900  | 0.76739100  | -2.14702100 |
| C  | 3.38277400  | -0.56362500 | 0.12152800  |
| H  | 4.45204500  | -0.62805000 | -0.16239300 |
| H  | 2.83669000  | -1.23041000 | -0.58931900 |
| H  | 3.27653900  | -0.96345700 | 1.15022800  |
| H  | -0.00335100 | -2.17166700 | -1.81415800 |
| C  | 0.00077600  | -2.34740700 | 1.56333400  |
| H  | 0.00297100  | -1.74190300 | 2.48679500  |
| H  | -0.91470800 | -2.95933300 | 1.46069100  |
| H  | 0.91472900  | -2.96107800 | 1.45749000  |

## Table S18

### N-C<sub>2</sub>H<sub>4</sub>-TS

| Atomic<br>Number | Coordinates (Angstroms) |             |            |
|------------------|-------------------------|-------------|------------|
|                  | X                       | Y           | Z          |
| N                | -0.46040000             | 0.46461600  | 1.74246800 |
| C                | 0.44244300              | -0.22036800 | 2.62087800 |
| H                | 0.07347400              | -0.91313100 | 3.38185900 |
| C                | 1.72248000              | 0.11187200  | 2.30969300 |
| H                | 2.65770900              | -0.22596000 | 2.76481100 |
| N                | 1.71041000              | 1.03807500  | 1.25138900 |



|   |             |             |             |
|---|-------------|-------------|-------------|
| N | 0.38454300  | 1.46395800  | 1.20241100  |
| C | -1.30493900 | -0.40638200 | 0.78604500  |
| C | -2.09480600 | -1.34929800 | 1.71671900  |
| H | -1.44434100 | -2.09336100 | 2.21674100  |
| H | -2.82818300 | -1.91693900 | 1.11085800  |
| H | -2.65290200 | -0.78083800 | 2.48754400  |
| C | -2.29864900 | 0.47610700  | 0.01084900  |
| H | -1.81059000 | 1.08303700  | -0.77847500 |
| H | -2.87847100 | 1.13562000  | 0.68869700  |
| H | -3.02371000 | -0.17832100 | -0.51265300 |
| C | -0.41816700 | -1.21007300 | -0.17984100 |
| H | 0.33007000  | -1.81988000 | 0.36615700  |
| H | 0.10997300  | -0.55057500 | -0.89760900 |
| H | -1.04558900 | -1.90483000 | -0.77445200 |
| C | 2.83119600  | 1.49381200  | 0.35712600  |
| C | 2.41967400  | 1.35276900  | -1.12402000 |
| H | 3.25711100  | 1.68704300  | -1.76836500 |
| H | 1.53995100  | 1.96894000  | -1.39722600 |
| H | 2.19775800  | 0.29714700  | -1.37641700 |
| C | 4.01959700  | 0.54865000  | 0.63454200  |
| H | 4.83847100  | 0.80285900  | -0.06646400 |
| H | 3.75072800  | -0.51349400 | 0.46762000  |
| H | 4.41994000  | 0.66768700  | 1.66098200  |
| C | 3.26219000  | 2.94182400  | 0.69613700  |
| H | 4.16367100  | 3.20390900  | 0.10707100  |
| H | 3.52491000  | 3.03892100  | 1.76899900  |
| H | 2.49401400  | 3.70198800  | 0.44943300  |
| C | 0.07992900  | 3.02601400  | 2.11912000  |
| H | 1.03621000  | 3.43227900  | 2.47621300  |
| H | -0.73889500 | 2.85774500  | 2.83130100  |
| C | -0.12457800 | 2.76540300  | 0.69315900  |
| H | 0.55694500  | 3.21981400  | -0.04254900 |
| H | -1.15121500 | 2.67329400  | 0.31068300  |

## Table S19

### P-C<sub>2</sub>H<sub>4</sub>-TS

| Atomic<br>Number | Coordinates (Angstroms) |             |             |
|------------------|-------------------------|-------------|-------------|
|                  | X                       | Y           | Z           |
| N                | 1.32124500              | -0.16442100 | -0.53700500 |
| C                | 0.68351000              | -1.12178500 | -1.38547700 |
| H                | 1.31137900              | -1.79230100 | -1.98702900 |
| C                | -0.68054700             | -1.12706700 | -1.38351600 |
| H                | -1.30492800             | -1.80243100 | -1.98327400 |
| N                | -1.32323200             | -0.17465400 | -0.53321600 |
| P                | -0.00401500             | 0.79968800  | -0.02491000 |
| C                | 2.49832800              | -0.55164700 | 0.34780900  |
| C                | 3.60851100              | -1.07962100 | -0.58312900 |
| H                | 3.32987800              | -2.03592200 | -1.06919500 |
| H                | 4.52151500              | -1.27561000 | 0.01356200  |

|   |             |             |             |
|---|-------------|-------------|-------------|
| H | 3.86078000  | -0.33983900 | -1.36903600 |
| C | 2.97586100  | 0.72490400  | 1.05752600  |
| H | 2.19163100  | 1.13336200  | 1.73263600  |
| H | 3.27775900  | 1.50638100  | 0.32993400  |
| H | 3.85456500  | 0.50004900  | 1.69376900  |
| C | 2.07807400  | -1.62438300 | 1.36815300  |
| H | 1.66928100  | -2.52268600 | 0.86218200  |
| H | 1.30783100  | -1.23450500 | 2.06715800  |
| H | 2.94754000  | -1.94579200 | 1.97660600  |
| C | -2.49486800 | -0.57083000 | 0.35484600  |
| C | -2.06349400 | -1.63998300 | 1.37430800  |
| H | -2.92882000 | -1.96821700 | 1.98501600  |
| H | -1.29463000 | -1.24384000 | 2.07131000  |
| H | -1.64882200 | -2.53507500 | 0.86743200  |
| C | -3.60338300 | -1.10770200 | -0.57298200 |
| H | -4.51325900 | -1.31054800 | 0.02618700  |
| H | -3.31864300 | -2.06197900 | -1.05948400 |
| H | -3.86344200 | -0.37015400 | -1.35845100 |
| C | -2.98045400 | 0.70214000  | 1.06552500  |
| H | -3.85560700 | 0.47058800  | 1.70425700  |
| H | -3.29047900 | 1.48100100  | 0.33854900  |
| H | -2.19759400 | 1.11693800  | 1.73835500  |
| C | -0.01135500 | 2.17039600  | -1.49093700 |
| H | -0.95686800 | 2.14427500  | -2.05520600 |
| H | 0.93272400  | 2.15149900  | -2.05788800 |
| C | -0.01145300 | 2.69875000  | -0.13794100 |
| H | -0.93851900 | 3.07925200  | 0.32812900  |
| H | 0.91400100  | 3.08633800  | 0.32549400  |

## Table S20

### As-C<sub>2</sub>H<sub>4</sub>-TS

| Atomic<br>Number | Coordinates (Angstroms) |             |             |
|------------------|-------------------------|-------------|-------------|
|                  | X                       | Y           | Z           |
| N                | 1.31986100              | -0.59584600 | -0.34499200 |
| C                | 0.67985300              | -1.84820800 | -0.22483400 |
| H                | 1.29506600              | -2.74277100 | -0.07208800 |
| C                | -0.68152700             | -1.84772400 | -0.22467300 |
| H                | -1.29742900             | -2.74183400 | -0.07198600 |
| N                | -1.32063100             | -0.59492600 | -0.34569400 |
| As               | 0.00024700              | 0.68858500  | 0.00111800  |
| C                | 2.77381700              | -0.45894400 | 0.05523900  |
| C                | 3.56343100              | -1.50643300 | -0.76359200 |
| H                | 3.32010900              | -2.54766700 | -0.47376700 |
| H                | 4.64678800              | -1.36377100 | -0.58004600 |
| H                | 3.37500400              | -1.38882400 | -1.84922900 |
| C                | 3.24939200              | 0.94729100  | -0.34476500 |
| H                | 2.73305300              | 1.74324300  | 0.23297900  |
| H                | 3.11164200              | 1.12980200  | -1.42974100 |
| H                | 4.32848000              | 1.05439400  | -0.11908200 |

|   |             |             |             |
|---|-------------|-------------|-------------|
| C | 2.94695200  | -0.68795800 | 1.56935600  |
| H | 2.58154300  | -1.68943600 | 1.87495500  |
| H | 2.39611400  | 0.07537900  | 2.15921700  |
| H | 4.01726800  | -0.62146500 | 1.85003700  |
| C | -2.77449500 | -0.45783000 | 0.05535900  |
| C | -2.94808500 | -0.69059000 | 1.56885700  |
| H | -4.01825500 | -0.62209200 | 1.84960700  |
| H | -2.39530400 | 0.06960300  | 2.16095500  |
| H | -2.58555300 | -1.69389900 | 1.87184400  |
| C | -3.56481800 | -1.50265800 | -0.76630200 |
| H | -4.64806000 | -1.36069300 | -0.58151700 |
| H | -3.32113600 | -2.54480300 | -0.48005100 |
| H | -3.37698600 | -1.38155000 | -1.85165700 |
| C | -3.24917800 | 0.94971500  | -0.34093300 |
| H | -4.32846000 | 1.05633600  | -0.11595100 |
| H | -3.11090100 | 1.13517900  | -1.42535200 |
| H | -2.73334400 | 1.74386400  | 0.23972600  |
| C | 0.00091300  | 2.36290600  | -0.89122000 |
| H | -0.91447400 | 2.66167200  | -1.43313100 |
| H | 0.91540700  | 2.65937500  | -1.43583700 |
| C | 0.00334600  | 2.58255300  | 0.67219800  |
| H | -0.91709600 | 2.96580800  | 1.14620700  |
| H | 0.92617100  | 2.96352800  | 1.14368400  |

## Table S21

### Sb-C<sub>2</sub>H<sub>4</sub>-TS

| Atomic<br>Number | Coordinates (Angstroms) |             |             |
|------------------|-------------------------|-------------|-------------|
|                  | X                       | Y           | Z           |
| N                | 1.38758000              | -0.82481100 | -0.30685300 |
| C                | 0.68723500              | -2.00399000 | -0.11916700 |
| H                | 1.26556500              | -2.91723700 | 0.08323500  |
| C                | -0.68834600             | -2.00359700 | -0.11950800 |
| H                | -1.26717000             | -2.91658600 | 0.08268100  |
| N                | -1.38803400             | -0.82402200 | -0.30779200 |
| Sb               | 0.00019100              | 0.75522200  | 0.01447800  |
| C                | 2.84375800              | -0.70335100 | 0.01812000  |
| C                | 3.59462000              | -1.77371400 | -0.80956700 |
| H                | 3.37361200              | -2.80183300 | -0.46009800 |
| H                | 4.68581500              | -1.61694900 | -0.69531300 |
| H                | 3.34157900              | -1.70109000 | -1.88597800 |
| C                | 3.28560500              | 0.69917300  | -0.43001100 |
| H                | 2.76339900              | 1.48611800  | 0.16451000  |
| H                | 3.09086700              | 0.86013200  | -1.50994700 |
| H                | 4.36811200              | 0.85256500  | -0.25105000 |
| C                | 3.10011800              | -0.89963600 | 1.52785100  |
| H                | 2.74013800              | -1.89088900 | 1.87115800  |
| H                | 2.58331800              | -0.11895600 | 2.12535600  |
| H                | 4.18372000              | -0.83803200 | 1.75487900  |
| C                | -2.84411800             | -0.70256400 | 0.01817100  |
| C                | -3.10074800             | -0.90437700 | 1.52701600  |

|   |             |             |             |
|---|-------------|-------------|-------------|
| H | -4.18442200 | -0.84285200 | 1.75371700  |
| H | -2.58380500 | -0.12647300 | 2.12791000  |
| H | -2.74177600 | -1.89723800 | 1.86665100  |
| C | -3.59561600 | -1.76958900 | -0.81332900 |
| H | -4.68674500 | -1.61332400 | -0.69778100 |
| H | -3.37423900 | -2.79902600 | -0.46797700 |
| H | -3.34314300 | -1.69274600 | -1.88958500 |
| C | -3.28530300 | 0.70180100  | -0.42471000 |
| H | -4.36814200 | 0.85436800  | -0.24706000 |
| H | -3.08900700 | 0.86719300  | -1.50372500 |
| H | -2.76417300 | 1.48614400  | 0.17416900  |
| C | 0.00063400  | 2.73539800  | -0.83968800 |
| H | -0.91571100 | 3.02934800  | -1.38496700 |
| H | 0.91662000  | 3.02883800  | -1.38582100 |
| C | 0.00140600  | 2.90913900  | 0.72623900  |
| H | -0.91878800 | 3.31334300  | 1.18577200  |
| H | 0.92235700  | 3.31255400  | 1.18489300  |

## Table S22

### Bi-C<sub>2</sub>H<sub>4</sub>-TS

| Atomic<br>Number | Coordinates (Angstroms) |             |             |
|------------------|-------------------------|-------------|-------------|
|                  | X                       | Y           | Z           |
| N                | 1.42797800              | -1.03238600 | -0.32592500 |
| C                | 0.70522700              | -2.15681400 | -0.10782400 |
| H                | 1.24593700              | -3.08069700 | 0.15896300  |
| C                | -0.70646900             | -2.15636800 | -0.10799500 |
| H                | -1.24779100             | -3.07991800 | 0.15872400  |
| N                | -1.42858600             | -1.03156800 | -0.32667200 |
| Bi               | 0.00016300              | 0.74176100  | 0.02314200  |
| C                | 2.88843600              | -0.98297600 | 0.00364200  |
| C                | 3.59542000              | -2.08851900 | -0.82122800 |
| H                | 3.32437000              | -3.10583400 | -0.47462200 |
| H                | 4.69213700              | -1.98273600 | -0.70166300 |
| H                | 3.35218400              | -2.00258300 | -1.89895000 |
| C                | 3.39562200              | 0.39917100  | -0.44278300 |
| H                | 2.91089400              | 1.21343400  | 0.14571900  |
| H                | 3.21325300              | 0.56940300  | -1.52311000 |
| H                | 4.48364700              | 0.49674800  | -0.25825100 |
| C                | 3.12787900              | -1.19059500 | 1.51525500  |
| H                | 2.72566600              | -2.16484400 | 1.86085100  |
| H                | 2.64696600              | -0.38703000 | 2.11246600  |
| H                | 4.21306500              | -1.17599600 | 1.74040900  |
| C                | -2.88898900             | -0.98195700 | 0.00373300  |
| C                | -3.12858400             | -1.19418900 | 1.51465100  |
| H                | -4.21380800             | -1.17950200 | 1.73960700  |
| H                | -2.64728400             | -0.39295600 | 2.11464000  |
| H                | -2.72731700             | -2.16984300 | 1.85727800  |
| C                | -3.59658800             | -2.08462400 | -0.82454000 |
| H                | -4.69322900             | -1.97927100 | -0.70391500 |
| H                | -3.32516500             | -3.10311200 | -0.48162500 |

|   |             |             |             |
|---|-------------|-------------|-------------|
| H | -3.35396100 | -1.99496000 | -1.90209400 |
| C | -3.39566300 | 0.40178500  | -0.43835700 |
| H | -4.48395500 | 0.49853600  | -0.25496200 |
| H | -3.21227100 | 0.57580300  | -1.51791600 |
| H | -2.91182300 | 1.21395500  | 0.15371700  |
| C | 0.00088300  | 2.83252600  | -0.83467100 |
| H | -0.91549900 | 3.10674700  | -1.38934600 |
| H | 0.91695200  | 3.10592600  | -1.39025400 |
| C | 0.00172300  | 3.03624200  | 0.68100800  |
| H | -0.91932200 | 3.44960800  | 1.12868500  |
| H | 0.92371200  | 3.44856000  | 1.12771100  |

## Table S23

### N-C<sub>2</sub>H<sub>4</sub>-Prod

| Atomic<br>Number | Coordinates (Angstroms) |             |             |
|------------------|-------------------------|-------------|-------------|
|                  | X                       | Y           | Z           |
| N                | -0.38391400             | 0.40023100  | 1.76707900  |
| C                | 0.54281200              | -0.35355800 | 2.53878200  |
| H                | 0.18598100              | -1.16641000 | 3.17702400  |
| C                | 1.80110300              | 0.13163800  | 2.45779200  |
| H                | 2.67829200              | -0.20521700 | 3.01675400  |
| N                | 1.89181400              | 1.27731700  | 1.61947000  |
| N                | 0.45849500              | 1.55397600  | 1.38816400  |
| C                | -1.34895800             | -0.28532100 | 0.79332400  |
| C                | -1.70967700             | -1.63403500 | 1.45654600  |
| H                | -0.85121600             | -2.33336500 | 1.48333100  |
| H                | -2.50722100             | -2.11255500 | 0.85531100  |
| H                | -2.10391700             | -1.49595800 | 2.48335800  |
| C                | -2.64572000             | 0.54869600  | 0.69802800  |
| H                | -3.04351600             | 0.77498000  | 1.70728200  |
| H                | -3.41624300             | -0.02976500 | 0.15041000  |
| H                | -2.53448800             | 1.50254100  | 0.14409300  |
| C                | -0.73510100             | -0.55354100 | -0.59033700 |
| H                | 0.17783800              | -1.17606100 | -0.51225500 |
| H                | -0.48733800             | 0.37468800  | -1.14238100 |
| H                | -1.46539700             | -1.10936100 | -1.21248700 |
| C                | 2.94801100              | 1.36563800  | 0.51185500  |
| C                | 2.51658800              | 0.69000000  | -0.79976600 |
| H                | 3.35394000              | 0.73175300  | -1.52533400 |
| H                | 1.65246000              | 1.18945100  | -1.28108100 |
| H                | 2.26740100              | -0.37742700 | -0.63955100 |
| C                | 4.18997900              | 0.63600600  | 1.07242100  |
| H                | 5.02755700              | 0.78455200  | 0.36325800  |
| H                | 4.02918300              | -0.45544700 | 1.17019200  |
| H                | 4.50452200              | 1.05063600  | 2.05119400  |
| C                | 3.33390900              | 2.84624500  | 0.29952100  |
| H                | 4.22644100              | 2.90381900  | -0.35490700 |
| H                | 3.58750600              | 3.32950300  | 1.26399200  |
| H                | 2.55339200              | 3.45347900  | -0.20160400 |
| C                | -0.00802800             | 2.86320000  | 1.97067100  |

|   |             |            |             |
|---|-------------|------------|-------------|
| H | 0.81083800  | 3.44632300 | 2.41905600  |
| H | -0.94991000 | 2.76866600 | 2.53242600  |
| C | -0.01988800 | 2.64699700 | 0.49692900  |
| H | 0.76610100  | 3.09629700 | -0.12319400 |
| H | -0.96756300 | 2.42904200 | -0.01165000 |

---

## Table S24

### P-C<sub>2</sub>H<sub>4</sub>-Prod

| Atomic<br>Number | Coordinates (Angstroms) |             |             |
|------------------|-------------------------|-------------|-------------|
|                  | X                       | Y           | Z           |
| N                | -0.27308200             | -0.10397800 | 1.23478200  |
| C                | 0.74259300              | -1.07731500 | 1.46410000  |
| H                | 0.45393600              | -2.10130700 | 1.71739500  |
| C                | 2.00125900              | -0.58984100 | 1.40452700  |
| H                | 2.92285500              | -1.14515000 | 1.60033000  |
| N                | 2.07539600              | 0.80564100  | 1.12352400  |
| P                | 0.49618500              | 1.36176600  | 0.89577500  |
| C                | -1.71892800             | -0.48944900 | 0.96460200  |
| C                | -2.08807500             | -1.66127800 | 1.89744800  |
| H                | -1.56098300             | -2.59941100 | 1.63464900  |
| H                | -3.17178700             | -1.86764500 | 1.79631800  |
| H                | -1.88347100             | -1.41721900 | 2.95927300  |
| C                | -2.63711800             | 0.70192700  | 1.29252200  |
| H                | -2.48062700             | 1.56363100  | 0.61237600  |
| H                | -2.51626800             | 1.03367600  | 2.34365800  |
| H                | -3.69259400             | 0.39425900  | 1.15762200  |
| C                | -1.85737300             | -0.90816000 | -0.51279200 |
| H                | -1.18028100             | -1.75313800 | -0.75232000 |
| H                | -1.62025200             | -0.07035600 | -1.20075300 |
| H                | -2.89572400             | -1.23403200 | -0.72502300 |
| C                | 3.37619300              | 1.48311600  | 0.72223200  |
| C                | 3.63850200              | 1.21661700  | -0.77355200 |
| H                | 4.60511100              | 1.66467100  | -1.08067000 |
| H                | 2.84564700              | 1.65529200  | -1.41416700 |
| H                | 3.68695200              | 0.12838900  | -0.98145400 |
| C                | 4.51199800              | 0.89556600  | 1.58507100  |
| H                | 5.43977700              | 1.46803500  | 1.38824200  |
| H                | 4.73346000              | -0.16135100 | 1.33836200  |
| H                | 4.28418800              | 0.97380900  | 2.66713600  |
| C                | 3.27807500              | 2.99248900  | 1.00871800  |
| H                | 4.25029000              | 3.46968600  | 0.77639800  |
| H                | 3.05326000              | 3.19193700  | 2.07606400  |
| H                | 2.52744600              | 3.50204100  | 0.37111400  |
| C                | -0.11521400             | 2.99159600  | 1.31452500  |
| H                | 0.59527800              | 3.74946900  | 1.68810200  |
| H                | -1.11661900             | 3.08577800  | 1.76954500  |
| C                | -0.05574500             | 2.64614800  | -0.24388200 |
| H                | 0.69032800              | 3.18660500  | -0.85378900 |
| H                | -1.01852000             | 2.52513700  | -0.77229400 |

---

## Table S25

### As-C<sub>2</sub>H<sub>4</sub>-Prod

| Atomic<br>Number | Coordinates (Angstroms) |             |             |
|------------------|-------------------------|-------------|-------------|
|                  | X                       | Y           | Z           |
| N                | -1.40321300             | -0.29426700 | 0.58521500  |
| C                | -0.68679100             | -1.35502200 | 1.15609700  |
| H                | -1.25899300             | -2.22584500 | 1.50478300  |
| C                | 0.68658300              | -1.35511200 | 1.15609300  |
| H                | 1.25866100              | -2.22599400 | 1.50481800  |
| N                | 1.40314000              | -0.29439100 | 0.58531400  |
| As               | 0.00004600              | 0.79659300  | -0.13011200 |
| C                | -2.65392400             | -0.59540900 | -0.22240000 |
| C                | -3.69035600             | -1.17801500 | 0.76731300  |
| H                | -3.40019400             | -2.17939700 | 1.14312700  |
| H                | -4.66042900             | -1.29612600 | 0.24462800  |
| H                | -3.84099100             | -0.50326800 | 1.63325600  |
| C                | -3.17398800             | 0.74177700  | -0.77418200 |
| H                | -2.46455900             | 1.17902000  | -1.51151500 |
| H                | -3.35351100             | 1.47270800  | 0.04082200  |
| H                | -4.13147800             | 0.59059200  | -1.31058000 |
| C                | -2.36145400             | -1.58659600 | -1.36465400 |
| H                | -1.94642400             | -2.53984100 | -0.97908900 |
| H                | -1.63596400             | -1.15876100 | -2.09008900 |
| H                | -3.28979900             | -1.82544100 | -1.92183500 |
| C                | 2.65381100              | -0.59553200 | -0.22236000 |
| C                | 2.36105000              | -1.58551400 | -1.36560300 |
| H                | 3.28943200              | -1.82447200 | -1.92268000 |
| H                | 1.63620000              | -1.15644100 | -2.09094800 |
| H                | 1.94520900              | -2.53885800 | -0.98115500 |
| C                | 3.68976200              | -1.17958100 | 0.76698500  |
| H                | 4.65986200              | -1.29765000 | 0.24434800  |
| H                | 3.39905400              | -2.18119400 | 1.14175800  |
| H                | 3.84056200              | -0.50574600 | 1.63360800  |
| C                | 3.17467800              | 0.74184700  | -0.77293900 |
| H                | 4.13220000              | 0.59058400  | -1.30925700 |
| H                | 3.35437500              | 1.47204200  | 0.04268600  |
| H                | 2.46564900              | 1.18000800  | -1.51011500 |
| C                | 0.00019100              | 2.34777300  | 1.17706100  |
| H                | 0.93519700              | 2.44850100  | 1.75549200  |
| H                | -0.93481900             | 2.44875000  | 1.75543900  |
| C                | 0.00028400              | 2.84955100  | -0.22207100 |
| H                | 0.93219700              | 3.20431100  | -0.69674500 |
| H                | -0.93151300             | 3.20455400  | -0.69679800 |

## Table S26

### Sb-C<sub>2</sub>H<sub>4</sub>-Prod

| Atomic<br>Number | Coordinates (Angstroms) |             |             |
|------------------|-------------------------|-------------|-------------|
|                  | X                       | Y           | Z           |
| N                | 1.41164200              | -0.71897700 | -0.46812900 |
| C                | 0.69682700              | -1.85000100 | -0.58323300 |
| H                | 1.20968900              | -2.82512600 | -0.51732600 |
| C                | -0.71483500             | -1.84713700 | -0.58562600 |
| H                | -1.23374400             | -2.81869300 | -0.51764500 |
| N                | -1.42406000             | -0.71159000 | -0.48017000 |
| Sb               | -0.00348800             | 0.83667700  | 0.25425100  |
| C                | 2.82538000              | -0.77460400 | 0.04628600  |
| C                | 3.67044100              | -1.54306200 | -0.99990800 |
| H                | 3.33456200              | -2.59274100 | -1.11802600 |
| H                | 4.72667200              | -1.56914200 | -0.66549700 |
| H                | 3.62916400              | -1.04740100 | -1.99019500 |
| C                | 3.31980500              | 0.67985300  | 0.13683400  |
| H                | 2.77537200              | 1.24240100  | 0.93124800  |
| H                | 3.19998600              | 1.20443200  | -0.83292900 |
| H                | 4.39315600              | 0.71679600  | 0.40922100  |
| C                | 2.90063700              | -1.46059000 | 1.42687700  |
| H                | 2.58539800              | -2.52274100 | 1.38024600  |
| H                | 2.26102600              | -0.93936900 | 2.17004600  |
| H                | 3.94209600              | -1.44028400 | 1.80620700  |
| C                | -2.83302300             | -0.75372900 | 0.04551600  |
| C                | -2.86649400             | -1.19144200 | 1.52583500  |
| H                | -3.90573300             | -1.42400800 | 1.83447100  |
| H                | -2.48933600             | -0.39032900 | 2.19616600  |
| H                | -2.25652500             | -2.10362700 | 1.68984200  |
| C                | -3.64287600             | -1.74209700 | -0.83281800 |
| H                | -4.72375100             | -1.52987600 | -0.71343900 |
| H                | -3.48180400             | -2.79730400 | -0.53305000 |
| H                | -3.38646500             | -1.62742600 | -1.90488000 |
| C                | -3.39594800             | 0.66763700  | -0.12007900 |
| H                | -4.40450700             | 0.75088800  | 0.33090900  |
| H                | -3.46047200             | 0.95773100  | -1.18750800 |
| H                | -2.75661500             | 1.41220500  | 0.41386900  |
| C                | 0.01611100              | 2.37958100  | -1.23656800 |
| H                | -0.90652300             | 2.48776500  | -1.83973700 |
| H                | 0.92596200              | 2.44404100  | -1.86499000 |
| C                | 0.04955800              | 3.17719900  | 0.06724300  |
| H                | -0.86221300             | 3.68066200  | 0.43387100  |
| H                | 0.99591500              | 3.62494000  | 0.41828100  |

## Table S27

### Bi-C<sub>2</sub>H<sub>4</sub>-Prod

| Atomic<br>Number | Coordinates (Angstroms) |             |             |
|------------------|-------------------------|-------------|-------------|
|                  | X                       | Y           | Z           |
| N                | 1.42095300              | -1.12102300 | -0.34230500 |
| C                | 0.70960300              | -2.18602200 | -0.02146700 |
| H                | 1.21585000              | -3.09487600 | 0.36004100  |



|    |             |             |             |
|----|-------------|-------------|-------------|
| C  | -0.73172100 | -2.18100500 | -0.02012800 |
| H  | -1.24284600 | -3.08546000 | 0.36544800  |
| N  | -1.43566800 | -1.11164500 | -0.34389500 |
| Bi | 0.00314800  | 0.80576300  | 0.06173200  |
| C  | 2.88671100  | -1.06922400 | -0.03823800 |
| C  | 3.57387000  | -2.21381600 | -0.82766500 |
| H  | 3.29750600  | -3.21258000 | -0.43376500 |
| H  | 4.67333000  | -2.11304300 | -0.73248400 |
| H  | 3.31242800  | -2.17034900 | -1.90373500 |
| C  | 3.39329200  | 0.28926900  | -0.55359000 |
| H  | 2.91992500  | 1.13059000  | 0.00690200  |
| H  | 3.18856600  | 0.41436900  | -1.63570200 |
| H  | 4.48489800  | 0.39131000  | -0.39333100 |
| C  | 3.14944000  | -1.21224500 | 1.47637400  |
| H  | 2.75328800  | -2.16856600 | 1.87471500  |
| H  | 2.68391700  | -0.38116600 | 2.04782400  |
| H  | 4.23909500  | -1.19111300 | 1.67725200  |
| C  | -2.90017100 | -1.04825700 | -0.03783700 |
| C  | -3.16415600 | -1.19455500 | 1.47622800  |
| H  | -4.25365100 | -1.16555400 | 1.67699700  |
| H  | -2.69225000 | -0.36934800 | 2.05085000  |
| H  | -2.77588400 | -2.15542900 | 1.87128900  |
| C  | -3.59665200 | -2.18500600 | -0.83083300 |
| H  | -4.69524100 | -2.07631800 | -0.73427600 |
| H  | -3.32693300 | -3.18700200 | -0.44056500 |
| H  | -3.33575800 | -2.13968700 | -1.90695300 |
| C  | -3.39677200 | 0.31570000  | -0.54895900 |
| H  | -4.48775900 | 0.42484000  | -0.38907100 |
| H  | -3.19098900 | 0.44265400  | -1.63065100 |
| H  | -2.91761700 | 1.15203100  | 0.01414600  |
| C  | 0.02185400  | 2.87539700  | -0.88399600 |
| H  | -0.89197900 | 3.14723300  | -1.44441800 |
| H  | 0.93692400  | 3.12736000  | -1.45159900 |
| C  | 0.03275400  | 3.13112200  | 0.60153900  |
| H  | -0.88259200 | 3.56001300  | 1.04649600  |
| H  | 0.96122400  | 3.54229900  | 1.03568500  |

---
